# Supplementary material for: Deterministic transition of enterotypes shapes the infant gut microbiome at an early age
Source: PubMed Central journal article supplement (PMC8383385; doi:10.1186/s13059-021-02463-3), 2021-08-24
Supplement: 13059_2021_2463_MOESM1_ESM.pdf [file 13059_2021_2463_MOESM1_ESM.pdf]

**Table S1. Characteristics of infants included in this study.**

| <b>Nation</b> | <b>Samples</b> | <b>Subjects</b> | <b>Status<br/>(term/preterm)</b> | <b>Gestation<br/>(weeks)</b> | <b>Sex<br/>(male/female)</b> | <b>Delivery<br/>(vaginal/c-section)</b> | <b>Breastfeed<br/>(yes/no)</b> | <b>Data type</b> |
|---------------|----------------|-----------------|----------------------------------|------------------------------|------------------------------|-----------------------------------------|--------------------------------|------------------|
| Australia     | 818            | 442             | 818/0                            | -                            | -                            | -                                       | -                              | 16S              |
| Bangladesh    | 1288           | 41              | 1292/0                           | -                            | -                            | -                                       | -                              | 16S              |
| Brazil        | 124            | 7               | 124/0                            | -                            | -                            | -                                       | -                              | 16S              |
| China         | 500            | 285             | 290/210                          | 31±1.3                       | 99/111                       | 128/258                                 | 210/0                          | 16S/WGS          |
| Estonia       | 483            | 78              | 483/0                            | -                            | 210/273                      | 450/33                                  | 394/89                         | 16S              |
| Finland       | 2246           | 139             | 2246/0                           | -                            | 1277/969                     | 2091/155                                | 1657/582                       | 16S              |
| India         | 331            | 14              | 331/0                            | -                            | -                            | -                                       | -                              | 16S              |
| Ireland       | 680            | 197             | 545/135                          | 38±3.5                       | 395/285                      | 289/365                                 | 404/276                        | 16S              |
| Italy         | 229            | 46              | 94/135                           | -                            | -                            | -                                       | 94/0                           | 16S/WGS          |
| Japan         | 485            | 72              | 301/184                          | 37±3                         | 298/172                      | 282/188                                 | -                              | 16S              |
| Luxembourg    | 85             | 18              | 85/0                             | 38.1±1.6                     | 57/28                        | 37/48                                   | 65/20                          | WGS              |
| Netherlands   | 915            | 120             | 915/0                            | 39.5±1.1                     | 422/493                      | 556/359                                 | 745/170                        | 16S              |
| Norway        | 2683           | 12              | 2683/0                           | -                            | -                            | -                                       | -                              | 16S              |
| Peru          | 488            | 22              | 488/0                            | -                            | -                            | -                                       | -                              | 16S              |
| Russia        | 623            | 72              | 623/0                            | -                            | 378/245                      | 545/78                                  | 478/79                         | 16S              |
| South Africa  | 148            | 7               | 148/0                            | -                            | -                            | -                                       | -                              | 16S              |
| USA           | 1650           | 384             | 447/1203                         | 29.5±4.6                     | 355/277                      | 104/525                                 | 271/605                        | 16S/WGS          |
| <b>Sum</b>    | <b>13776</b>   | <b>1956</b>     | <b>11909/1867</b>                | <b>36±5</b>                  | <b>3491/2853</b>             | <b>4482/1869</b>                        | <b>4318/1821</b>               |                  |

**Table S2. The number of samples assigned to the four enterotypes.**

|            | <b>Enterotype 1<br/>(Firmicutes)</b> | <b>Enterotype 2<br/>(<i>Bifidobacterium</i>)</b> | <b>Enterotype 3<br/>(<i>Bacteroides</i>)</b> | <b>Enterotype 4<br/>(<i>Prevotella</i>)</b> | <b>Sum</b>   |
|------------|--------------------------------------|--------------------------------------------------|----------------------------------------------|---------------------------------------------|--------------|
| Year 1     | 3062                                 | 4036                                             | 3046                                         | 0                                           | 10144        |
| Year 2     | 0                                    | 791                                              | 1403                                         | 329                                         | 2523         |
| Year 3     | 0                                    | 437                                              | 603                                          | 69                                          | 1109         |
| <b>Sum</b> | <b>3062</b>                          | <b>5264</b>                                      | <b>5052</b>                                  | <b>398</b>                                  | <b>13776</b> |

**Table S3. Statistical tests of the transition of enterotypes associated with clinical factors.**

|                                            | <b>Year 1</b> | <b>Year 2</b> | <b>Year 3</b> |
|--------------------------------------------|---------------|---------------|---------------|
| Number of subjects shifted                 | 549           | 133           | 21            |
| Number of subjects fixed                   | 382           | 169           | 82            |
| Sex (P value, chisq.test)                  | 0.7484        | 0.9099        | 0.4595        |
| Gestation age (P value, wilcoxon.test)     | 0.4725        | 0.3529        | -             |
| Birth mode (P value, chisq.test)           | 0.277         | 0.2734        | -             |
| Breastfeeding status (P value, chisq.test) | 0.07634       | 0.4884        | 0.4926        |

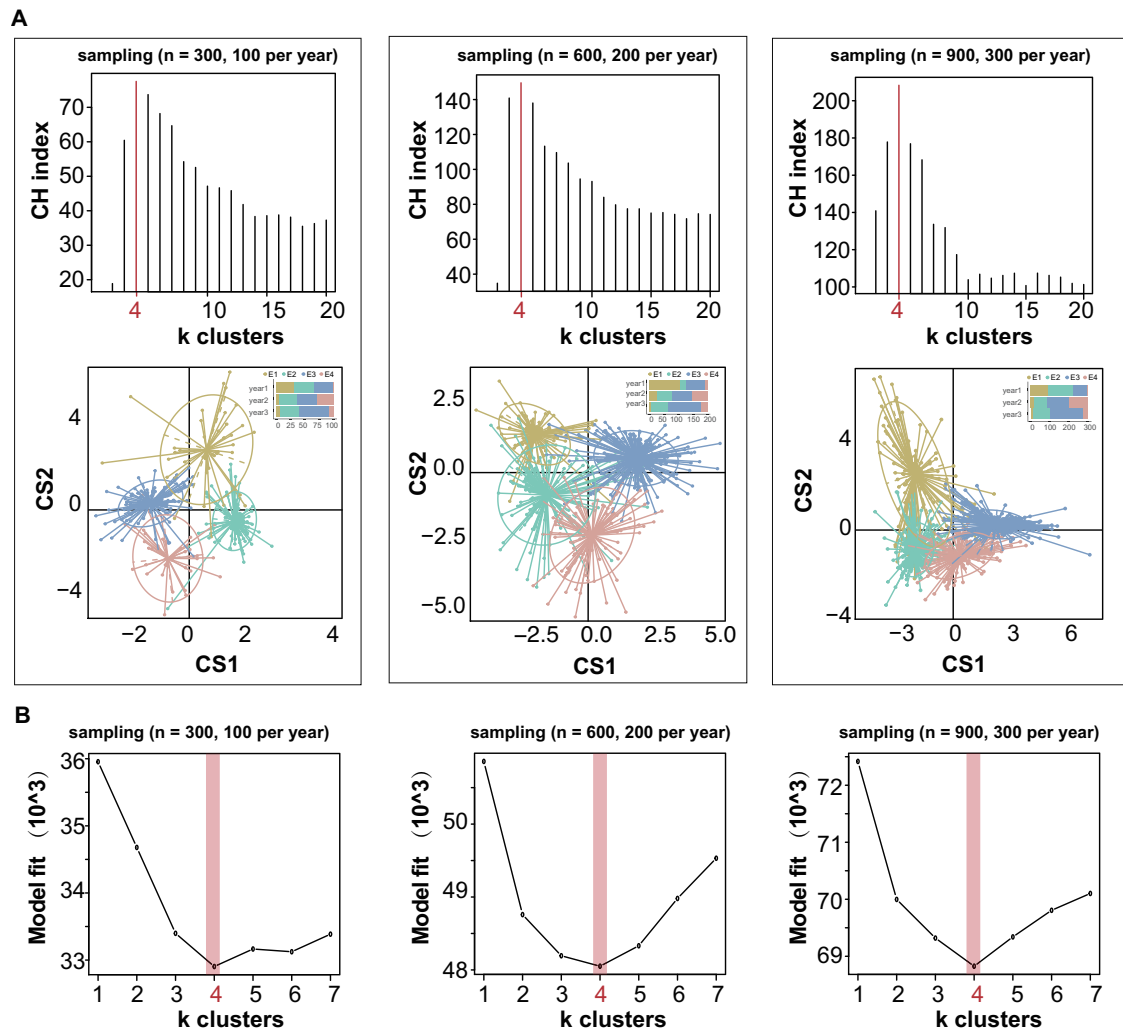

**Fig S1. Enterotype clustering based on random sampling.** (A) Random sampling from 3 years using partitioning around medoid (PAM) protocol. The number of samples from each year is 100 (left), 200 (middle), 300 (right), respectively. On the top row, the X axis indicates optimal number of clusters which was calculated using the Calinski–Harabasz index. The bar-plot shows the number of enterotypes in each year. (B) Enterotype clustering using Dirichlet multinomial mixtures (DMM) approach. The X axis indicates optimal number of clusters which was determined based on the lowest Laplace approximation score. The red bar highlights the optimal number of clusters in each subset.



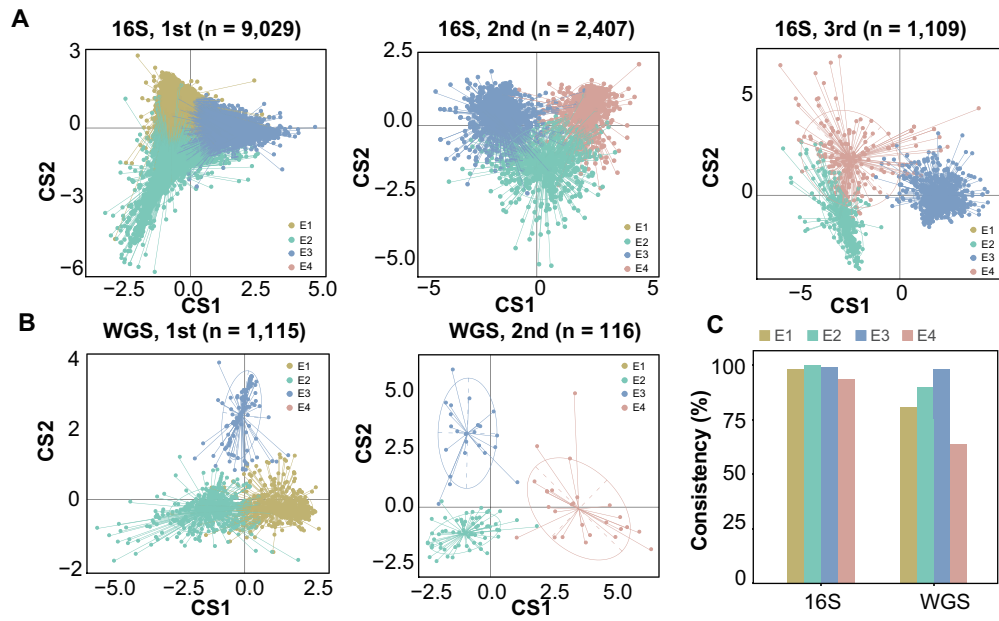

**Fig S2. Enterotype clustering based on 16S rRNA and metagenomic data, respectively.** (A) Enterotype clustering based on 16S rRNA gene sequencing data. (B) Enterotype clustering based on metagenomic data. (C) The consistency between the enterotypes clustered by 16S (left four bars) or metagenomic (right four bars) data and the enterotypes clustered by all data.

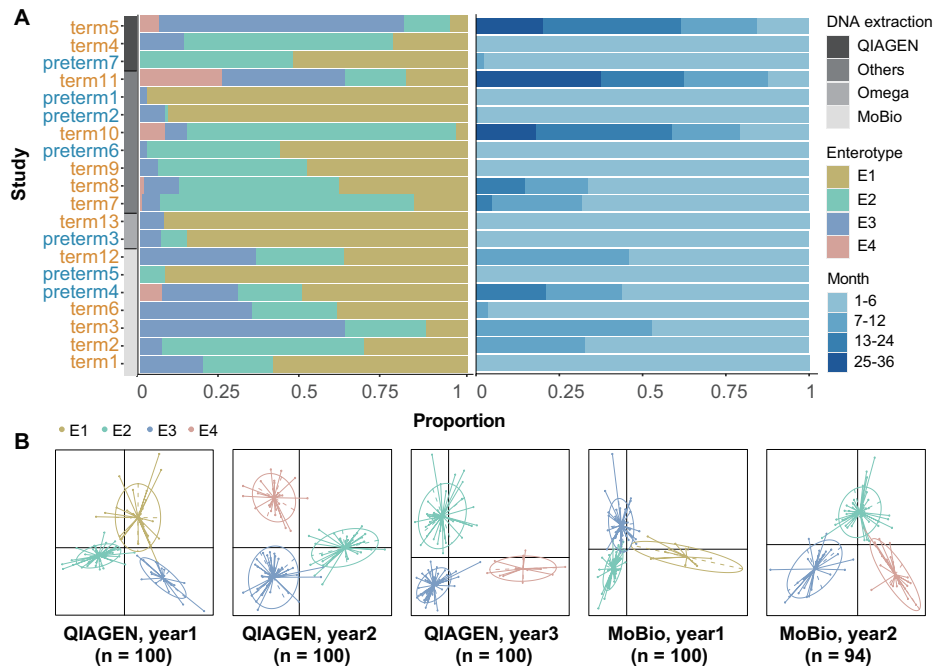

**Fig S3. The effect of “study” on the enterotype clustering analysis.** (A) The composition of enterotypes (left) and the composition of developmental stages (right) in each study. The grey bar on the left of the panel represents different products of DNA isolation method. (B) Enterotype clustering on fecal samples processed by different DNA isolation kits (QIAGEN, MoBio). Note: there are no 3<sup>rd</sup> year samples in the MoBio group.

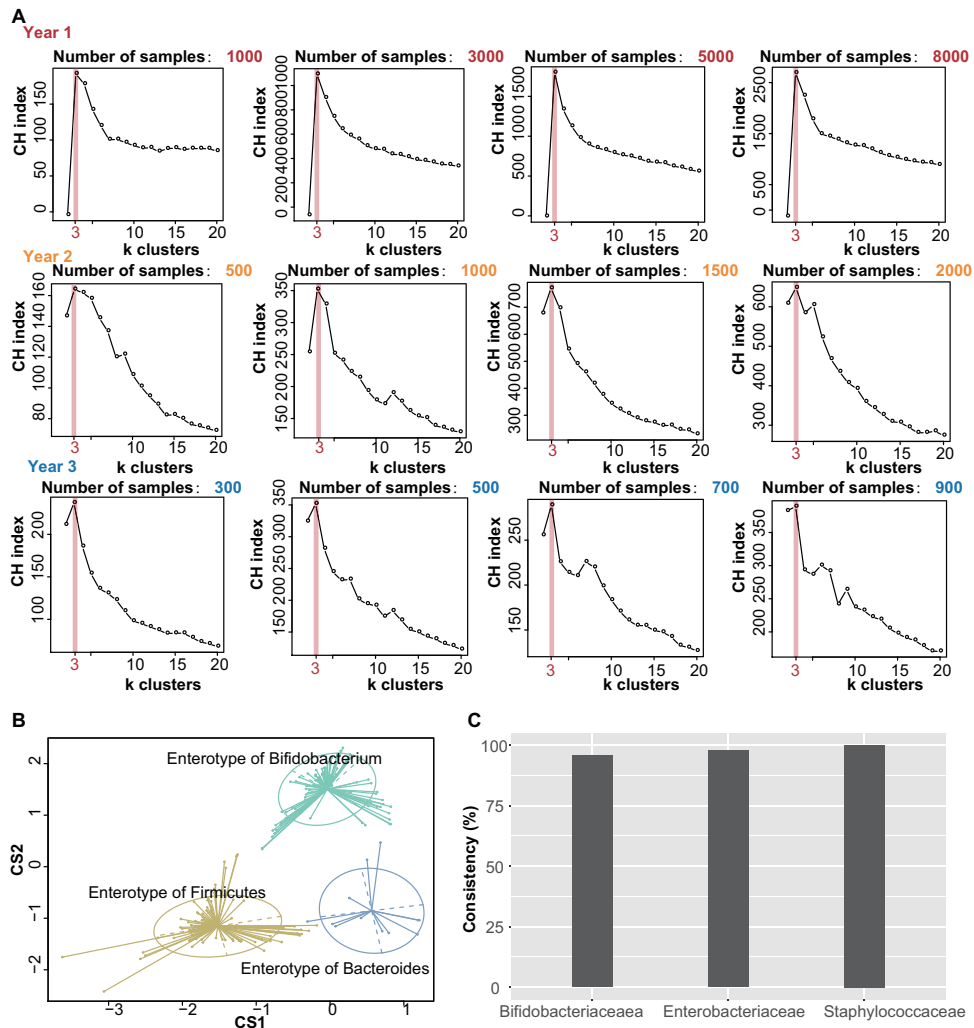

**Fig S4. Enterotype clustering with different sample sizes and different cohorts.** (A) Different samples were selected randomly for verifying the stability of enterotype clustering. The X axis indicates optimal number of clusters which was calculated using the Calinski–Harabasz index. The red bar highlighted in each plot indicates the optimal number of clusters in each subset. (B) Enterotypes formed in our study using the Takahiro’s datasets. (C) The overlaps of enterotype clusters between our study and the previous study[1].

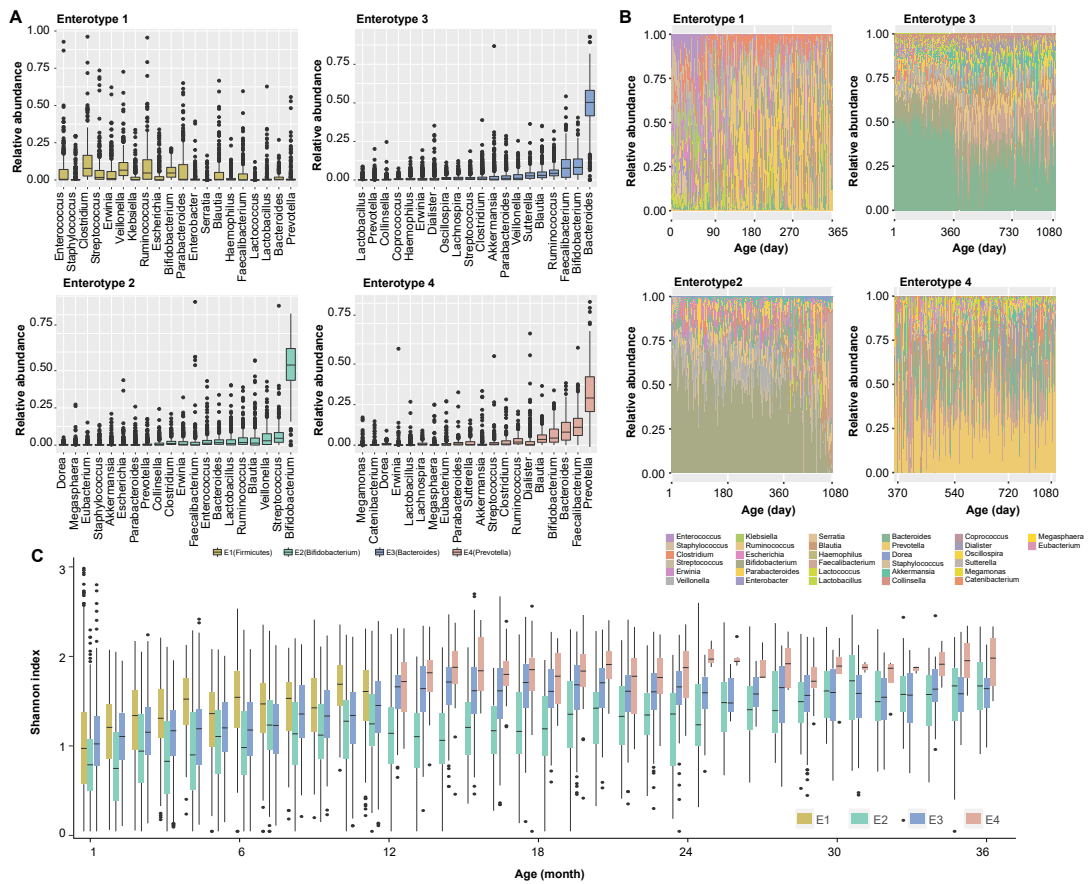

**Fig S5. Community characteristics of four enterotypes associated with chronological ages.** (A) Relative abundance of top 20 genus. (B) Relative abundance of dominant taxa at the genus level. (C) Alpha diversity based on Shannon index in different age groups.

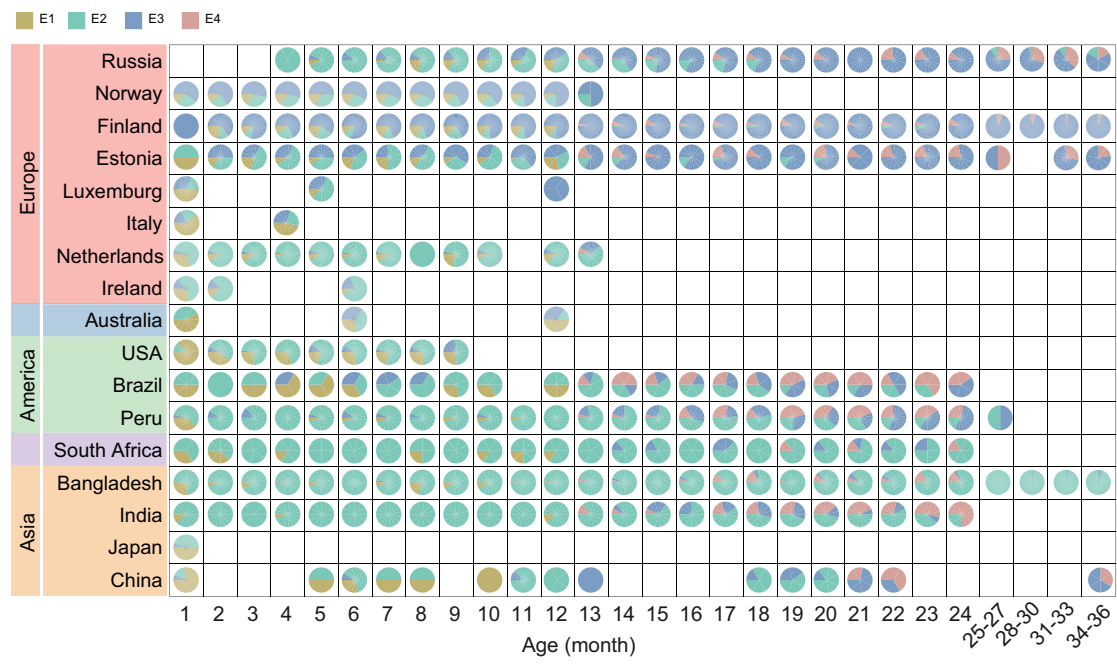

**Fig S6. Geography-related pattern of enterotypes based on full-term datasets (n = 11,909).**

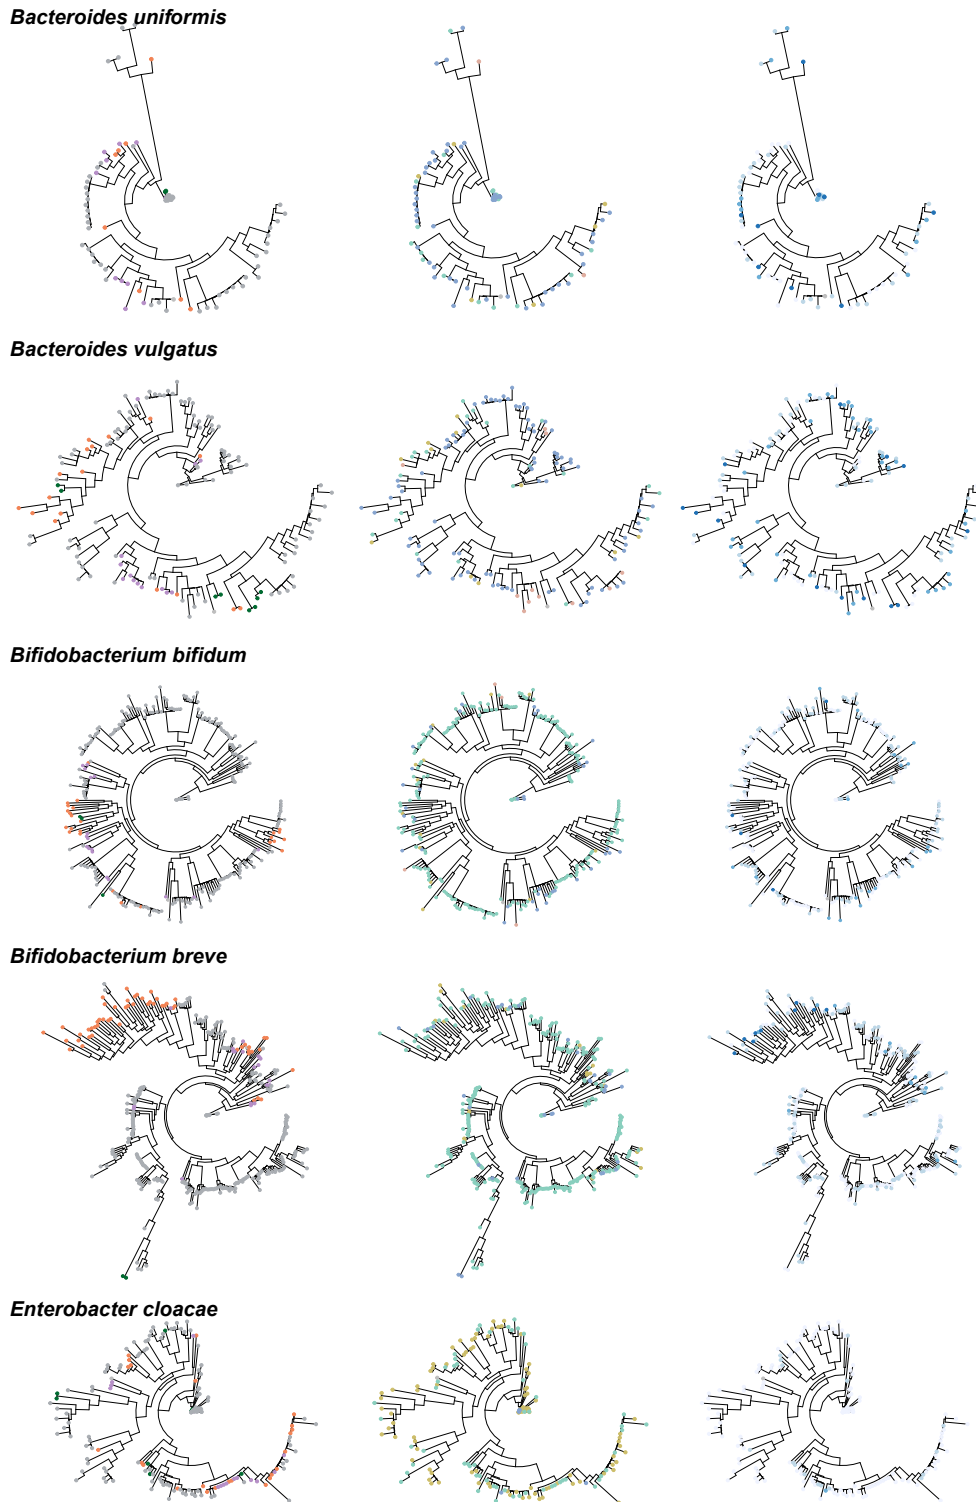

**Fig S7. Phylogenetic trees of different species denoted with country (left), enterotype (middle) and developmental stage (right). Each node in the phylogenetic tree indicates a specific strain come from each infant. The SNV-based analysis and tree construction was implemented using StrainPhlAn.**

***Escherichia coli***

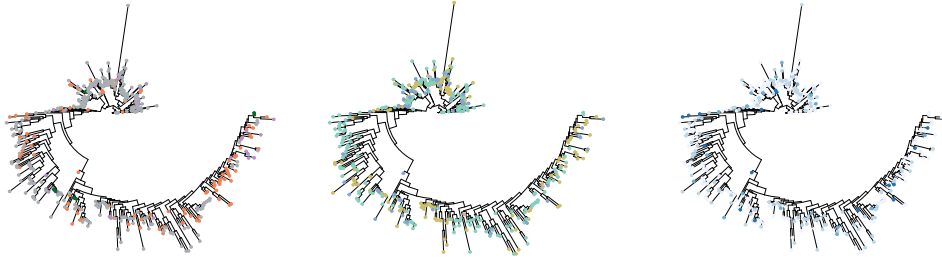

***Klebsiella pneumoniae***

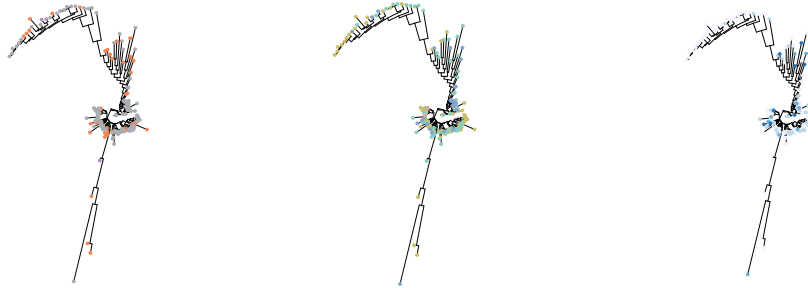

***Prevotella copri***

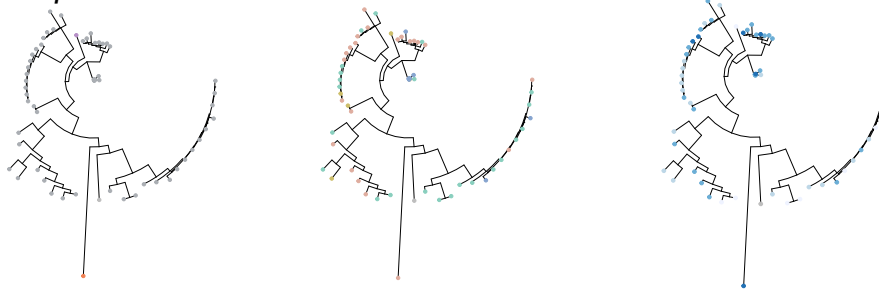

***Ruminococcus gnavus***

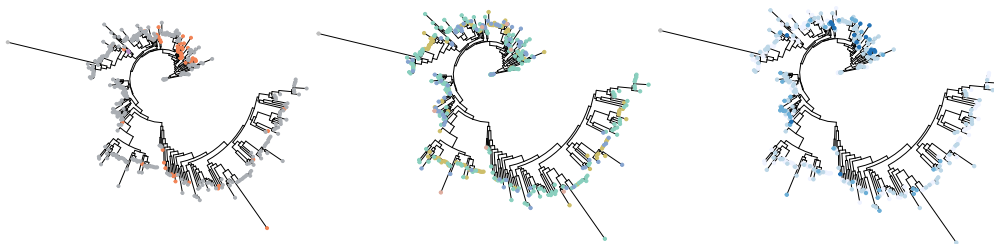

● Italy ● USA ● China ● Luxemburg ● E1 ● E2 ● E3 ● E4 ● month 1-6 ● month 7-12 ● month 13-18 ● month 19-24

**Fig S7-continued.**

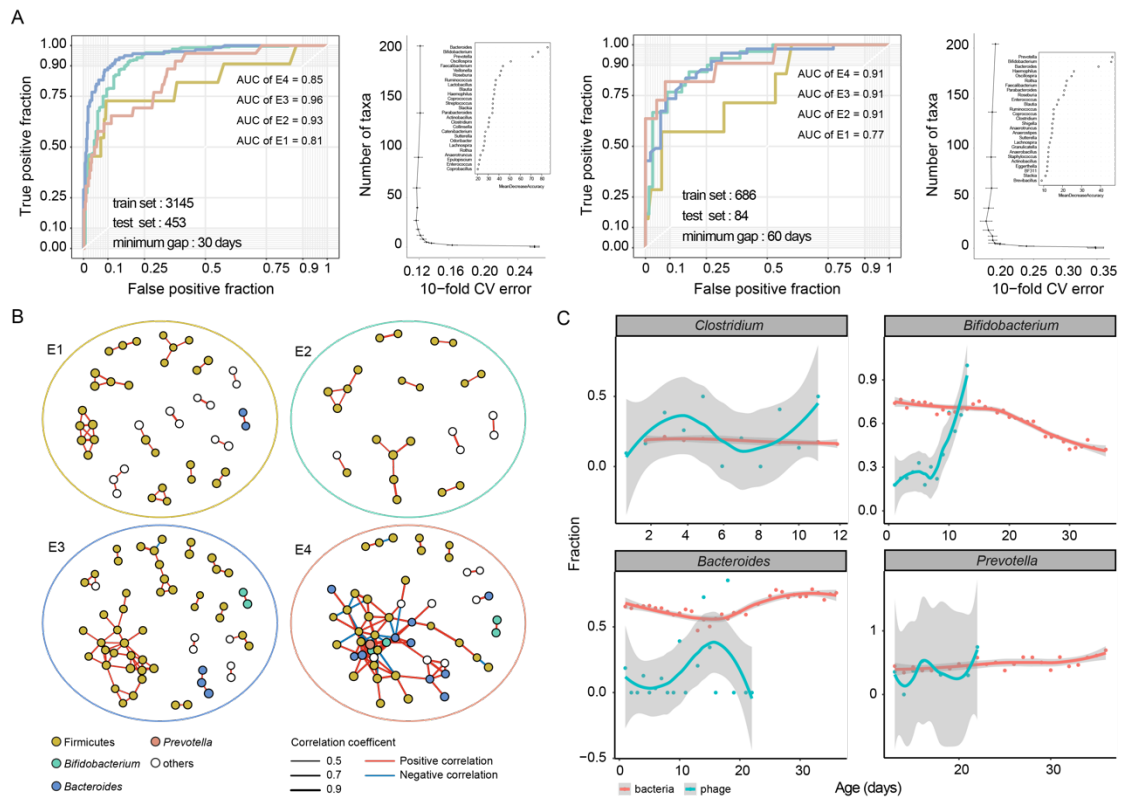

**Fig S8. Influencing factors and outcomes associated with enterotype transition.** (A) Prediction of enterotype transition based on random forest model. The minimum gap is 30 and 60 days, respectively. Results of 10-fold Cross Validation are presented on the right. (B) Co-occurrence network of four enterotypes. Each node indicates a specific species and each edge indicates the interaction between two species. The size of edges scale with the correlation coefficient. Only correlation coefficients greater than 0.5 (for enterotype 4, greater than 0.8) presented. (C) The correlation between four enterotype taxa and their associated bacteriophages.



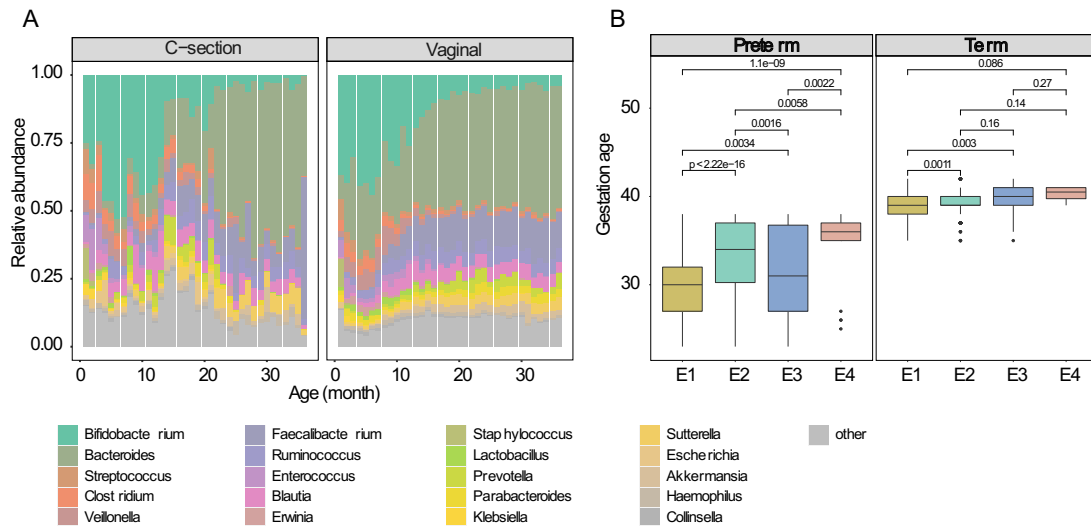

**Fig S9. Variation of gut microbiota and enterotypes associated with clinical factors.** (A) The relative abundance of the top 20 most abundant genera in all subjects over 36 months in different birth modes, i.e. C-section (left) or vaginal delivery (right). (B) The distribution of infants with different gestation age, i.e. preterm (left) or full-term (right).

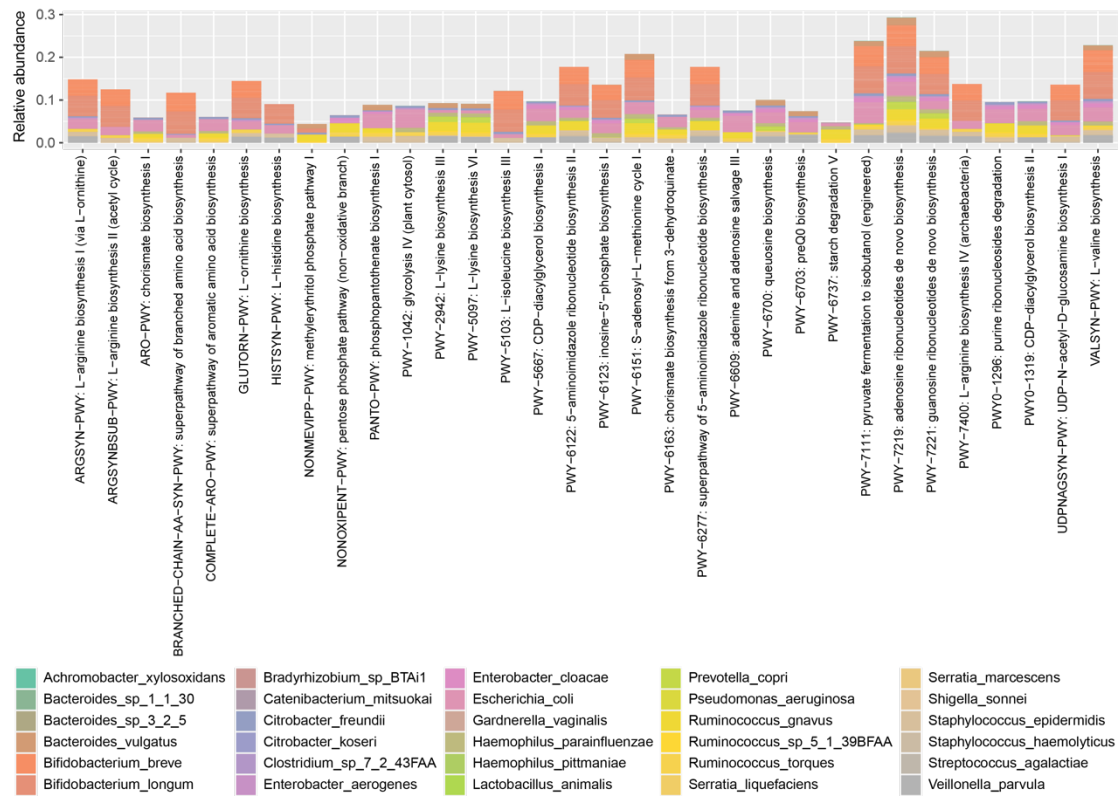

**Fig S10. The top 30 contributing bacterial species to each pathway.** Contributions of the top 30 species in 32 most significant pathways between enterotypes. Contributions were calculated with HUMAnN2.

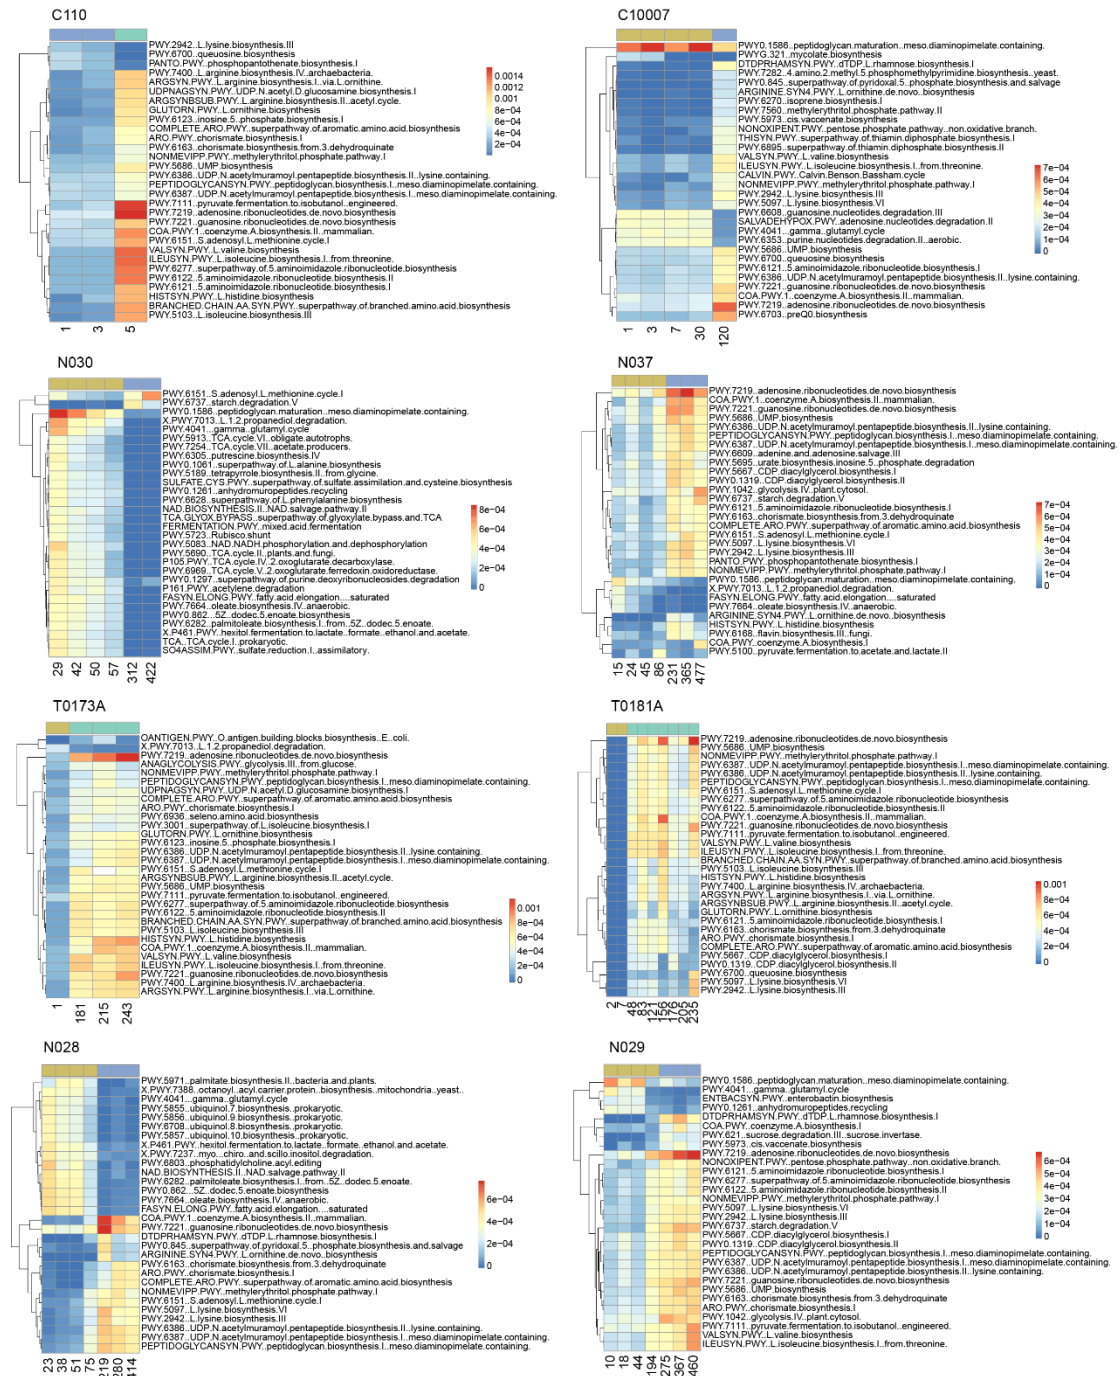

**Fig S11. The associations between functional changes and transition of enterotypes in individual subjects.** Heatmaps indicate the variation of the 30 most significantly different pathways of enterotypes in the first two years. Bar plots indicate the transition of enterotypes over time.

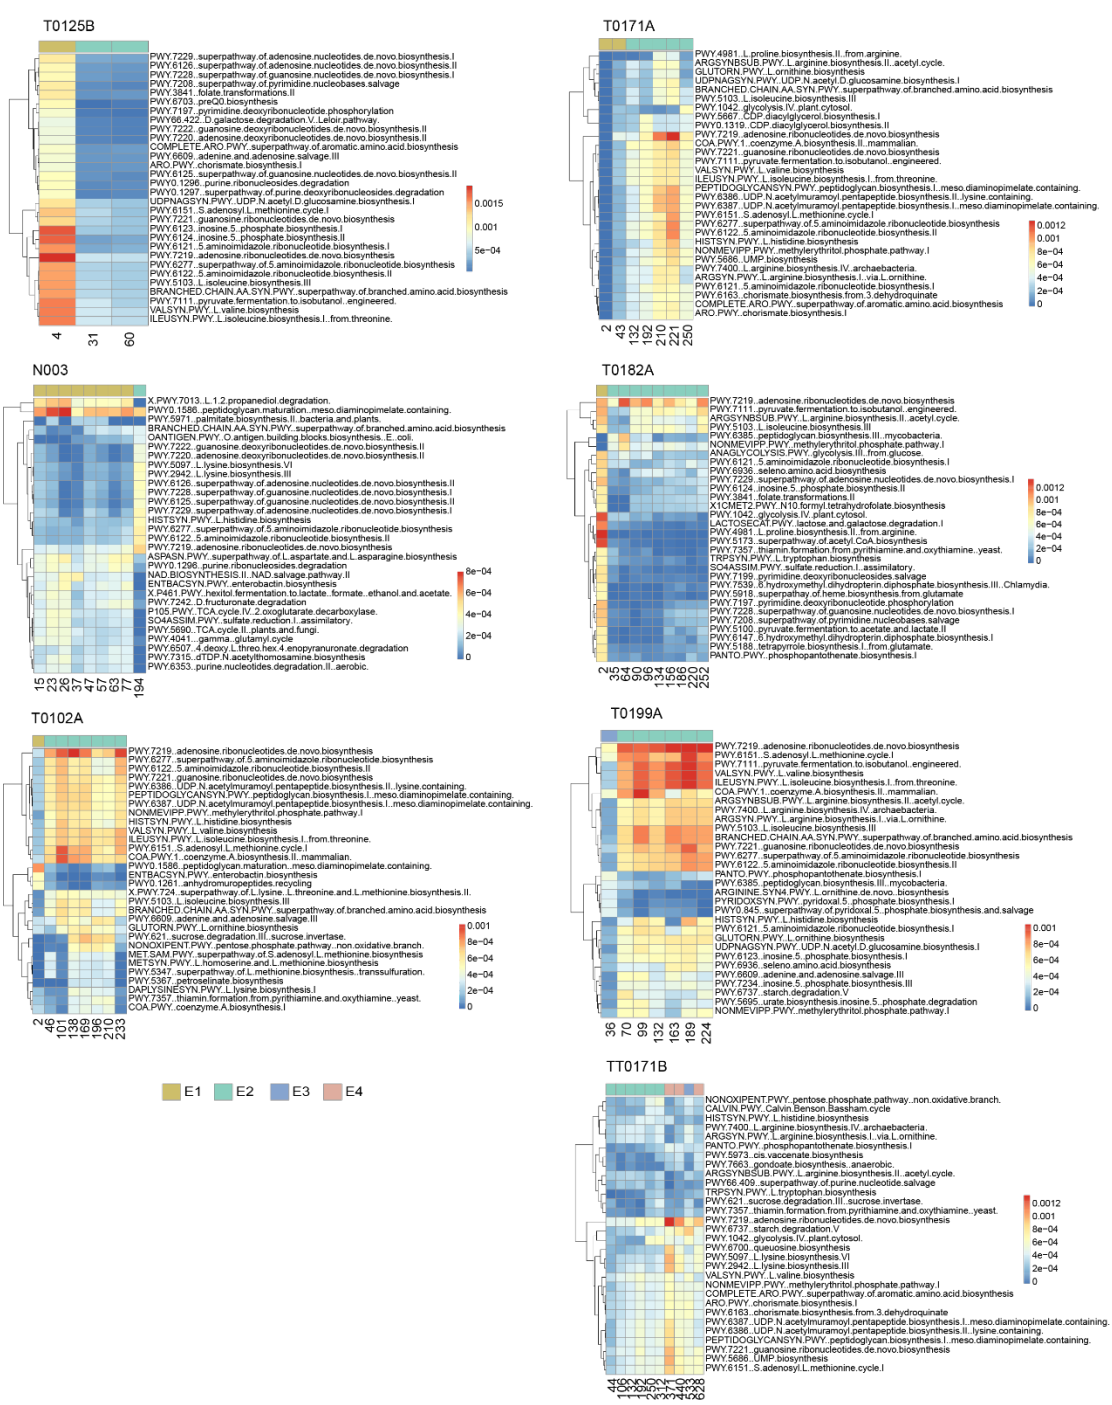

Fig S11-continued.

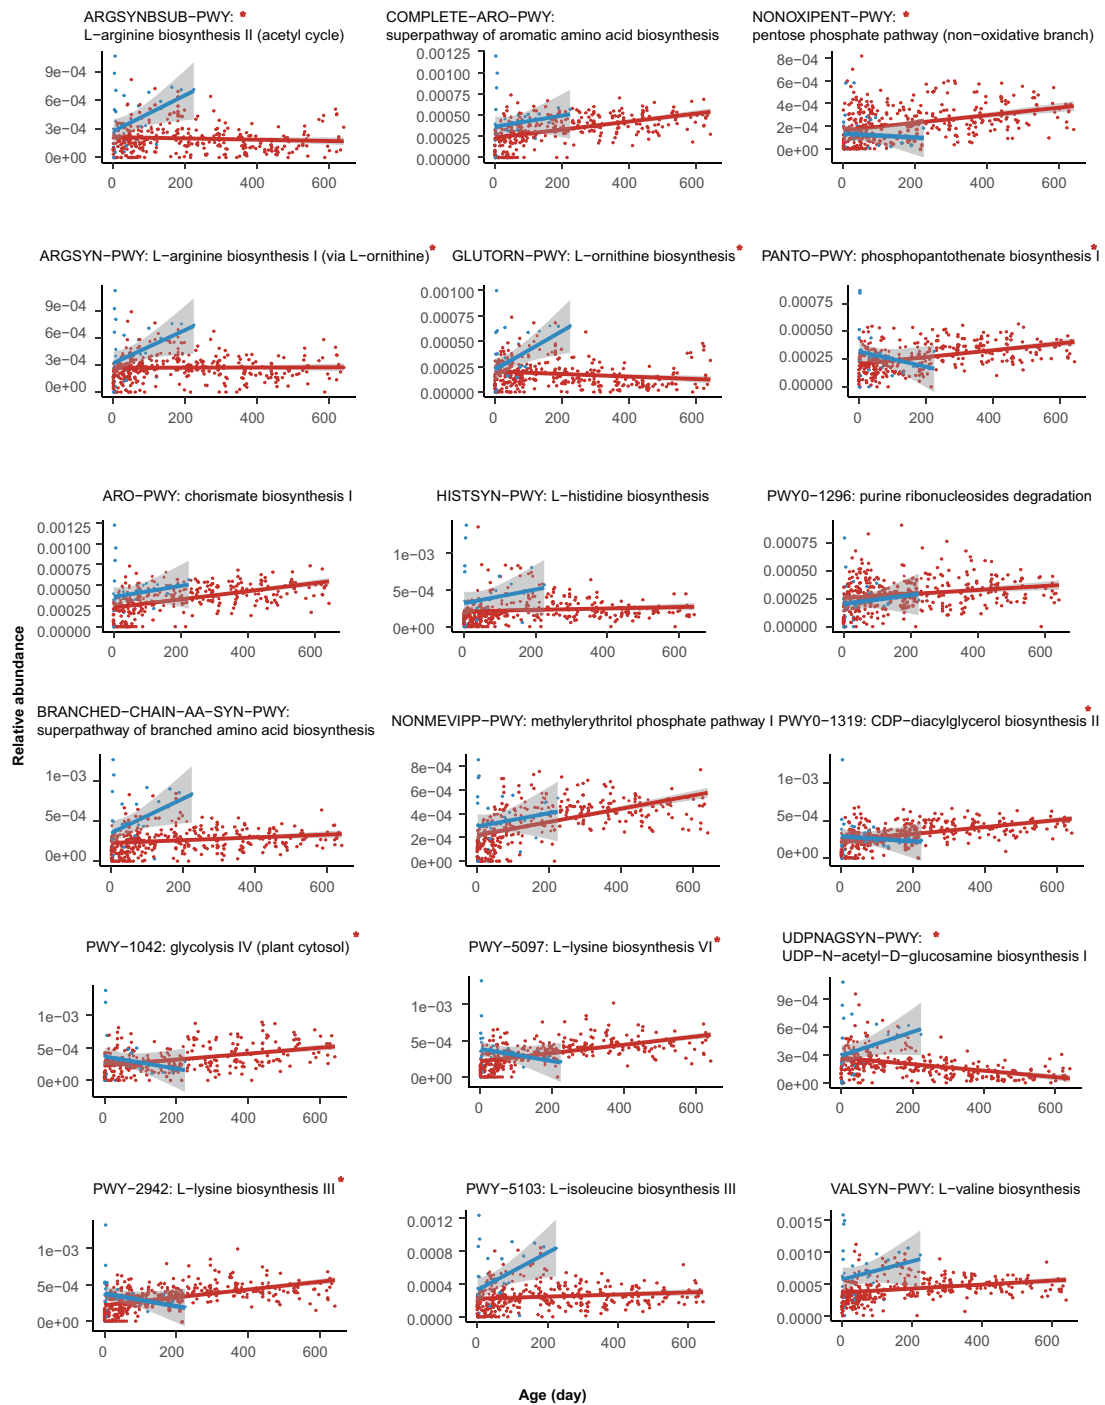

**Fig S12. Variations of function features over time in infant's gut microbiota.** Red lines indicate infant groups which started with E1 or E2 and transited to E3 or E4 and blue lines indicate infant group started with E3 or E4 and transited to E1 or E2. The X axis indicates the chronological ages in days. The Y axis indicates the relative abundance of each pathway. The red asterisks in plots indicate opposite trend between two subgroups.

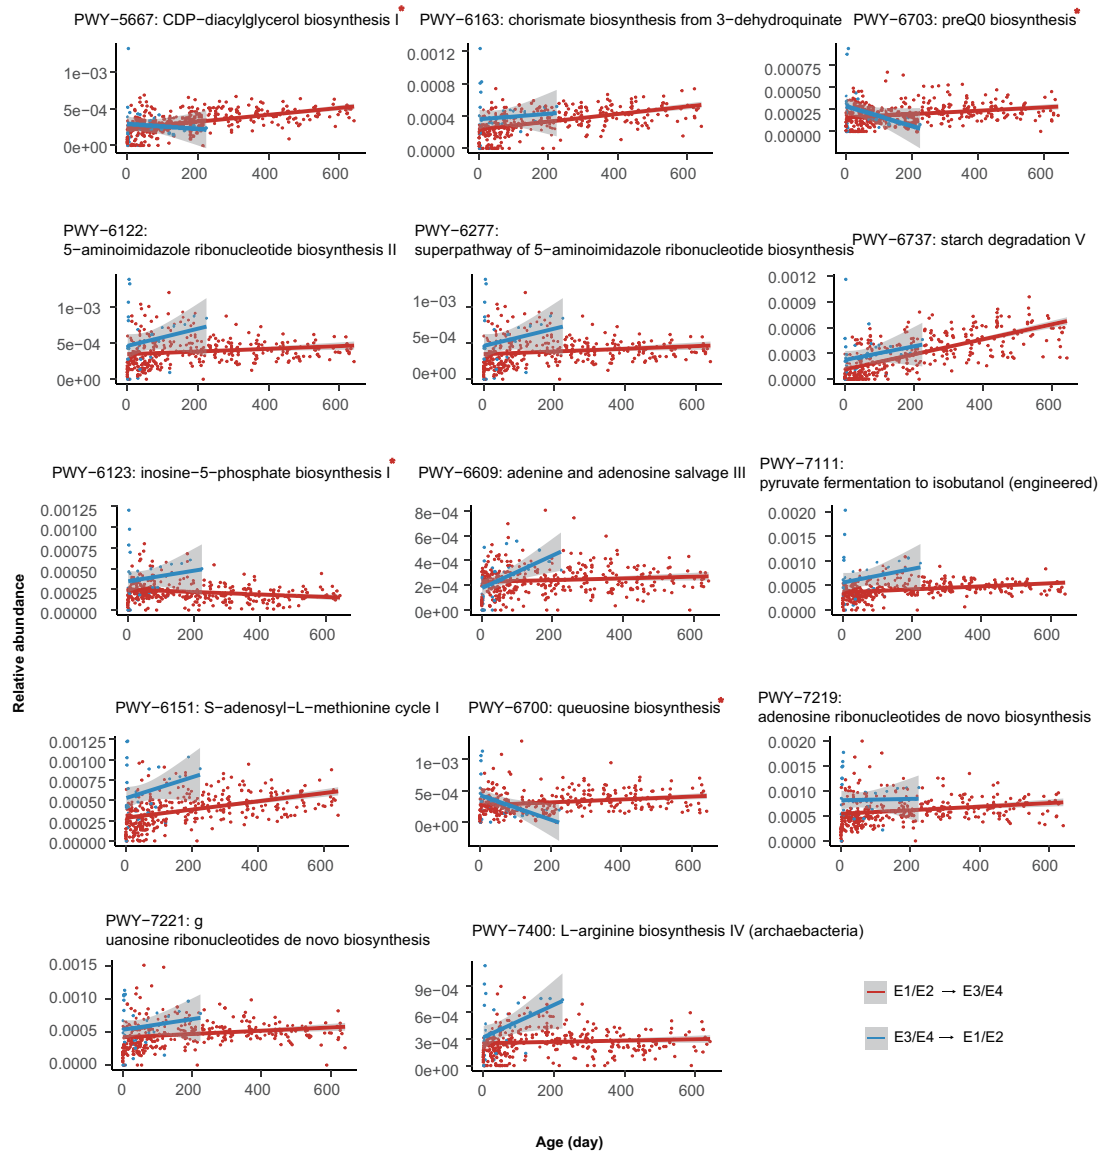

Fig S12-continued.
